# Supplementary material for: Topological insulator bismuth selenide with a unique cloud-like hollow structure as a bidirectional electrocatalyst for robust lithium–sulfur batteries
Source: Royal Society of Chemistry journal article supplement (doi:10.1039/d3ta04930b), 2023-01-01
Supplement: d3ta04930b1.pdf [file d3ta04930b1.pdf]

## Supporting Information

### **Topological insulator bismuth selenide with unique cloud-like hollow structure as a bidirectional electrocatalyst for robust lithium-sulfur batteries**

Mincai Zhao<sup>a,1</sup>, Junjie Fu<sup>a,1</sup>, Daoping Cai<sup>a,\*</sup>, Chaoqi Zhang<sup>a</sup>, Ban Fei<sup>a,c</sup>, Yinggan Zhang<sup>b,\*</sup>, Baisheng Sa<sup>a</sup>, Qidi Chen<sup>a</sup>, and Hongbing Zhan<sup>a</sup>

<sup>a</sup> College of Materials Science and Engineering, Fuzhou University, Fuzhou, 350108, China.

<sup>b</sup> College of Materials Science and Engineering, Xiamen University, Xiamen, 361005, China.

<sup>c</sup> School of Chemistry, Trinity College Dublin, Dublin 2, Ireland.

\*Corresponding authors: Daoping Cai, and Yinggan Zhang.

E-mail addresses: [dpcai@fzu.edu.cn](mailto:dpcai@fzu.edu.cn), and [ygzhang@xmu.edu.cn](mailto:ygzhang@xmu.edu.cn).

## **Experimental Section**

### **1.1. Synthesis of BiOBr nanobelts**

The synthesis of BiOBr nanosheets was carried out as follows, where 0.2 g of polyethylene glycol was dissolved in a mixture solution of 10 mL of ethanol and 10 mL deionized water and stirring for 2 min. Then 1.0 mg of bismuth nitrate pentahydrate ( $\text{Bi}(\text{NO}_3)_3 \cdot 5\text{H}_2\text{O}$ ) and 0.4 mL hydrogen bromide (HBr) were added. After 5 min stirring, the mixture solution was transferred into a 25 mL Teflon-lined autoclave with a stainless-steel shell and kept at 160 °C for 6 h. The product was collected after centrifugation, thoroughly washed with deionized water and ethanol several times, and finally dried in an oven at 60 °C for overnight.

### **1.2. Synthesis of $\text{Bi}_2\text{S}_3$ and BiSe**

Typically, 7.8 mg of selenium powder and 20 mg of as-synthesized BiOBr nanosheets were dispersed in a mixture solution of 3 mL hydrazine hydrate and 20 mL deionized water, and then transferred into a 25 mL Teflon-lined autoclave with a stainless-steel shell and kept at 165 °C for 12 h. After cooling naturally, the  $\text{Bi}_2\text{Se}_3$  was collected after centrifugation, thoroughly washed with deionized water and ethanol several times, and finally dried in an oven at 60 °C for overnight. The BiSe went through the same process by changing the amount of the selenium powder to 5.2 mg.

### **1.3. Synthesis of KB/S cathode**

The KB/S composite was prepared by the melt-diffusion method. The KB mixed with sublimed sulfur (weight ratio of 1:3) were placed into a sealed glass bottle and the KB/S composite was obtained after heating at 155 °C for 12 h. The KB/S composite cathode was prepared by the slurry-coating method. The slurry was prepared by mixing KB/S composites, KB, and PVDF with a mass ratio of 8:1:1 in NMP. The slurry was then spread on carbon coated aluminum foil and dried in a vacuum oven at 60 °C for 6 h, then the carbon coated aluminum foil with dried slurry was punched into circle disks with a diameter of 12 mm. The areal sulfur loading for each disk was controlled around 1.0 mg cm<sup>-2</sup>.

#### **1.4. Preparation of the Bi<sub>2</sub>Se<sub>3</sub> modified separator**

The Bi<sub>2</sub>Se<sub>3</sub> layer uniformly coated on a separator was obtained by the vacuum filtration method. 4.2 mg of Bi<sub>2</sub>Se<sub>3</sub>, 1.2 mg of PVDF and 0.6 mg of rGO were dispersed in 10 mL NMP by sonication for 2 h to obtain a homogeneous suspension, which was filtered through a polypropylene (PP) membrane (Celgard 2400), the obtained functionalized separator was dried at 60 °C overnight under vacuum. Eventually, the coated separator was cut into discs with a diameter of 19 mm. BiSe coated separator was prepared using the same method. The mass loading of the modified materials were controlled at about 0.6 mg cm<sup>-2</sup>.

#### **1.5. Lithium polysulfide (Li<sub>2</sub>S<sub>6</sub>) solution and visualized adsorption test**

0.1 M Li<sub>2</sub>S<sub>6</sub> solution was prepared by dissolving S and Li<sub>2</sub>S (the molar ratio was 5:1) in a mixed solvent of 1,2-dimethoxyethane (DME) and 1,3-dioxolane (DOL) (v/v =1:1) under vigorous stirring at 70 °C for 24 h. Then 20 mg Bi<sub>2</sub>Se<sub>3</sub> and BiSe were put

into 3 mL  $\text{Li}_2\text{S}_6$  solution for visualized adsorption test. All the above operations were carried out in an argon-filled glove box.

### **1.6. Symmetric cell assembly and kinetic evaluation of polysulfide conversion**

0.25 M  $\text{Li}_2\text{S}_6$  electrolyte was prepared by vigorous stirring S and  $\text{Li}_2\text{S}$  (the molar ratio is 5:1) in the electrolyte (1 M bis(trifluoromethanesulfonyl)imide lithium salt ( $\text{LiTFSI}$ ) in DOL/DME (v:v = 1:1)) at 70 °C for 24 h. The electrode was prepared by mixing active materials ( $\text{Bi}_2\text{Se}_3$  and  $\text{BiSe}$ ) and PVDF with a weight ratio of 9:1 in NMP solvent followed by coating the slurry onto Al foil. Two identical electrodes were used as the working and the counter electrodes with a mass loading of 1.0 mg  $\text{cm}^{-2}$ , and 40  $\mu\text{L}$  of  $\text{Li}_2\text{S}_6$  (0.25 M) was used as electrolyte. The CV measurements of the symmetric cells were tested measured by electrochemical workstation (CHI660E) with a voltage window between  $-1.0$  to  $1.0$  V at scan rates of 1, 3, 5 and 10  $\text{mV s}^{-1}$ .

### **1.7. $\text{Li}_2\text{S}$ nucleation and decomposition measurements**

For the study of liquid-solid conversion kinetics,  $\text{Li}_2\text{S}_8$  solution (0.5 M) was prepared by mixing S and  $\text{Li}_2\text{S}$  (molar ratio of 7:1) and dissolving the mixture in DME and DOL (v/v = 1:1) solution containing 1.0 M  $\text{LiTFSI}$  under vigorous stirring for 24 h. nucleation and decomposition experiments of  $\text{Li}_2\text{S}$  on different reactive surfaces were investigated in 2032-type coin cells with Celgard 2400 PP membrane as separator. Carbon papers (CP) were used as current collector to load the  $\text{Bi}_2\text{Se}_3$  and  $\text{BiSe}$ , CP- $\text{Bi}_2\text{Se}_3$  and CP- $\text{BiSe}$  were applied as cathodes and lithium foil was used as anode. 20  $\mu\text{L}$  of  $\text{Li}_2\text{S}_8$  (0.5 M) was dropped onto the cathode, and blank electrolyte with 1.0 M  $\text{LiTFSI}$  and 1 wt %  $\text{LiNO}_3$  but without  $\text{Li}_2\text{S}_8$  was dropped onto anode side.

For  $\text{Li}_2\text{S}$  nucleation, the cells were first discharged galvanostatically at 0.112 mA to 2.19 V and then kept potentiostatically at 2.05 V for  $\text{Li}_2\text{S}$  to nucleate until the current dropped below  $10^{-2}$  mA for depositing and growth of  $\text{Li}_2\text{S}$  on various host surfaces. For  $\text{Li}_2\text{S}$  decomposition, the assembled cells were galvanostatically discharged to 1.70 V at 0.112 mA for complete transformation of LiPSs into solid  $\text{Li}_2\text{S}$  and then potentiostatically charged at 2.35 V until the charge current was below  $10^{-2}$  mA for the oxidization process from solid  $\text{Li}_2\text{S}$  to soluble LiPSs.

### **1.8. Materials characterization**

The information of composition, microstructure and morphology of the products were analyzed by X-ray diffractometer (XRD, Rigaku, D/max-Ultima III diffractometer, Cu  $K\alpha$  radiation,  $\lambda = 0.15418$  nm), X-ray photoelectron spectroscopy (XPS, Thermo Fisher Scientific, ESCALAB 250), field emission scanning electron microscope (FESEM, Germany, Zeiss Supra 55), high-resolution transmission electron microscope (HRTEM, FEI, Talos F200i), the thermogravimetric analysis (TGA, NETZSCH, STA449-F5).

### **1.9. Electrochemical measurements**

CR2032 coin cells were assembled in an Ar-filled glovebox ( $<0.5$  ppm of  $\text{O}_2$ ) by using the KB/S cathode, modified separators, and Li foil anodes. The electrolyte was bis(trifluoromethanesulfonyl)imide lithium (1 M) in a mixed solvent of 1,2-dimethoxyethane and 1,3-dioxolane (1:1, v/v) with  $\text{LiNO}_3$  (1 wt.%). Galvanostatic charge and discharge tests were conducted on LAND CT2001A within a potential range from 1.7 to 2.8 V. The specific capacity was calculated based on the weight of

sulfur in each cell (1 C=1675 mA g<sup>-1</sup>). Cyclic voltammetry curves and electrochemical impedance spectroscopy were measured by electrochemical workstation (CHI660E). CV curves were performed with the sweep rates from 0.1 to 0.4 mV s<sup>-1</sup>. EIS profiles were tested with the frequency range from 10<sup>-2</sup> to 10<sup>5</sup> Hz.

### 1.10. Computational methods

Density functional theory (DFT) calculations presented in our work have been carried out by the Vienna *ab initio* Simulation Package (VASP) [S1,S2]. And the generalized gradient approximations (GGA) of Perdew-Burke-Ernzerhof (PBE) [S3] were used for the exchange-correlation functional [S4]. A cutoff energy of 500 eV was applied in all calculations. A vacuum space of 15 Å in the *z*-axis direction to avoid the interaction between repeated units were introduced. The binding energy ( $E_b$ ) is defined as the energy difference of adsorbed model ( $E_{\text{Li}_2\text{S}_n/\text{sur}}$ ) and the summation of pure  $\text{Li}_2\text{S}_n$  ( $E_{\text{Li}_2\text{S}_n}$ ,  $n=1, 2, 4, 6, 8$ ) molecule and the surface energy ( $E_{\text{sur}}$ ) according to  $E_b = E_{\text{Li}_2\text{S}_n/\text{sur}} - E_{\text{sur}} - E_{\text{Li}_2\text{S}_n}$  [S5]. The Gibbs free energy change ( $\Delta G$ ) was calculated by the equation:  $\Delta G = \Delta E + \Delta \text{ZPE} - T\Delta S$ , where  $\Delta E$  was the change of total energy,  $\Delta \text{ZPE}$  was the difference of zero-point energy,  $T$  was 298.15 K,  $\Delta S$  was the change of entropy, respectively. The zero-point energy and entropy from vibrational degrees of freedom were obtained with the fixed substrate. All the calculation models adopted in this work were conducted with the ALKEMIE platform [S6].

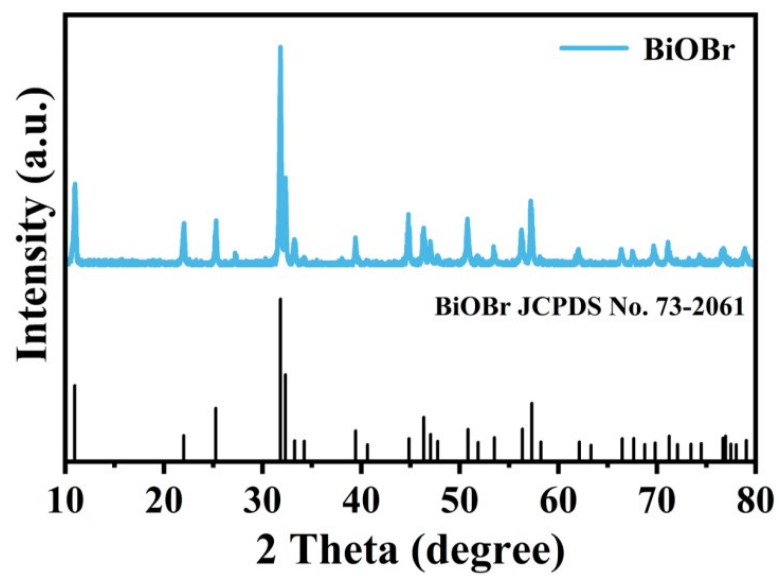

**Fig. S1.** (a) XRD of the BiOBr nanosheets.

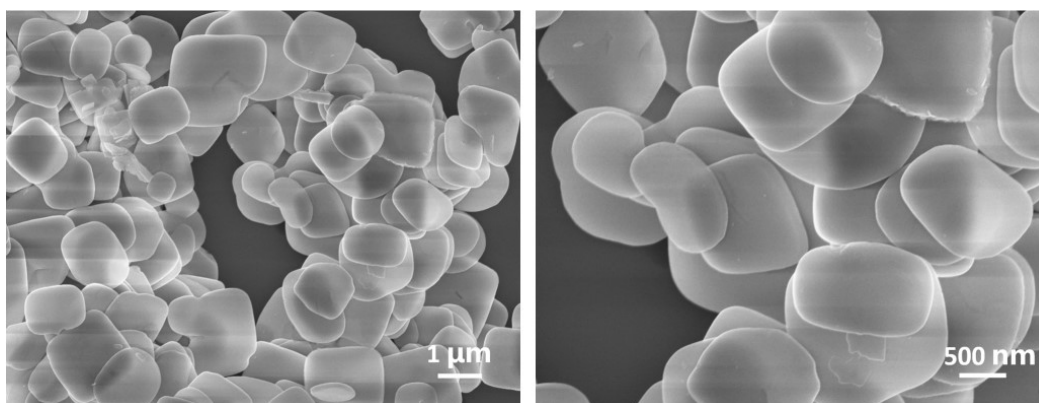

**Fig. S2.** SEM images of the BiOBr nanosheets.

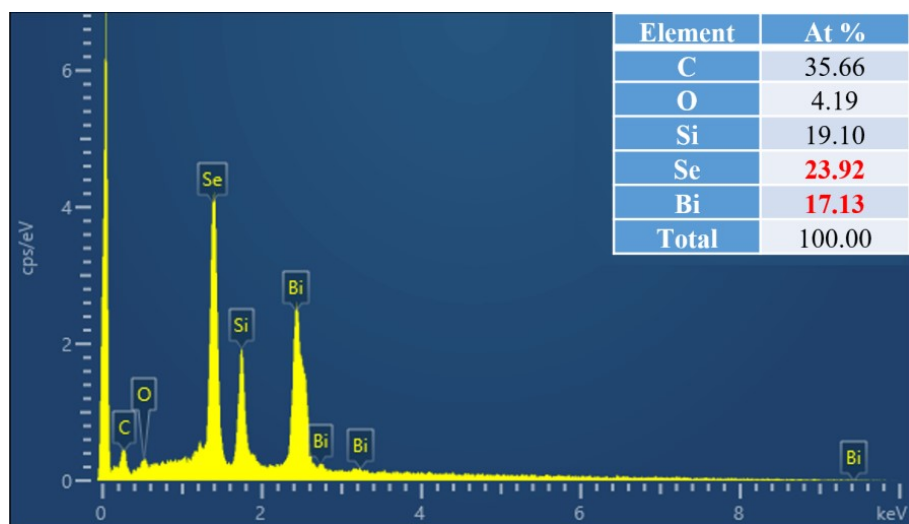

**Fig. S3.** EDS spectrum of the  $\text{Bi}_2\text{Se}_3$ .

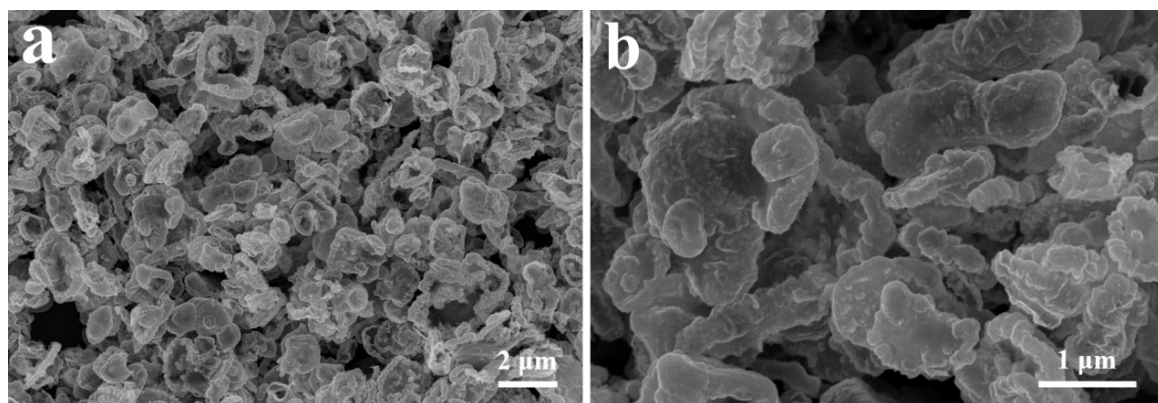

**Fig. S4.** SEM images of the  $\text{BiSe}$ .



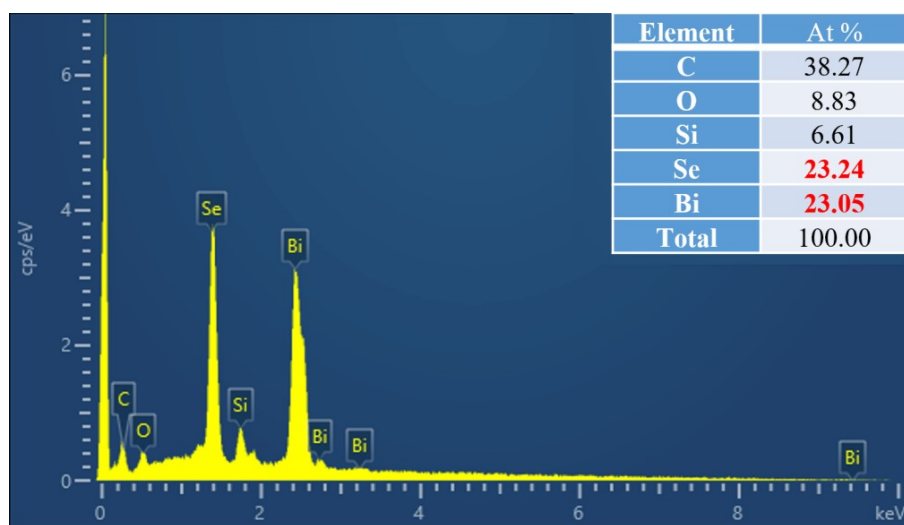

Fig. S5. EDS spectrum of the BiSe.

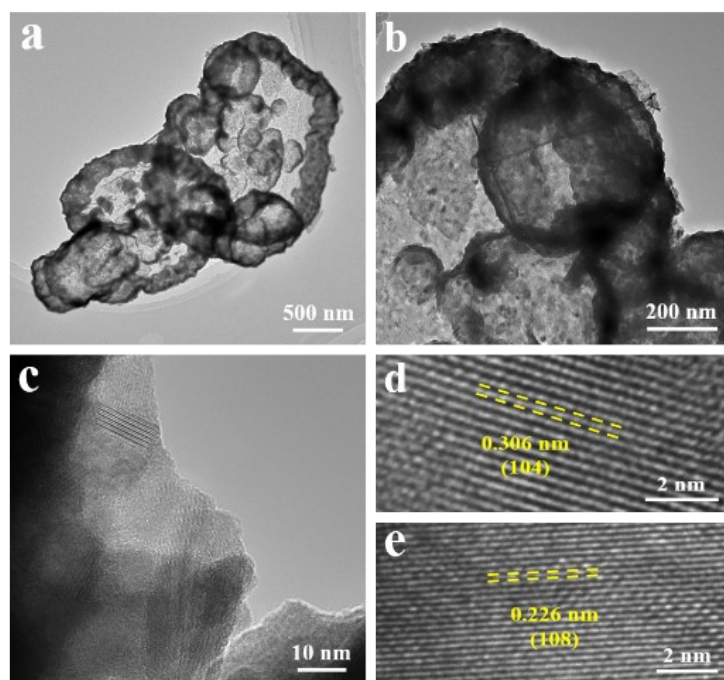

Fig. S6. (a, b) TEM and (c-e) HRTEM images of the BiSe.

**Table S1.** the actual content of Bi and Se in the  $\text{Bi}_2\text{Se}_3$  and BiSe by ICP-OES.

| Nominal composition      | ICP-AES composition           |
|--------------------------|-------------------------------|
| $\text{Bi}_2\text{Se}_3$ | $\text{Bi}_{2.14}\text{Se}_3$ |
| BiSe                     | $\text{Bi}_{1.2}\text{Se}$    |

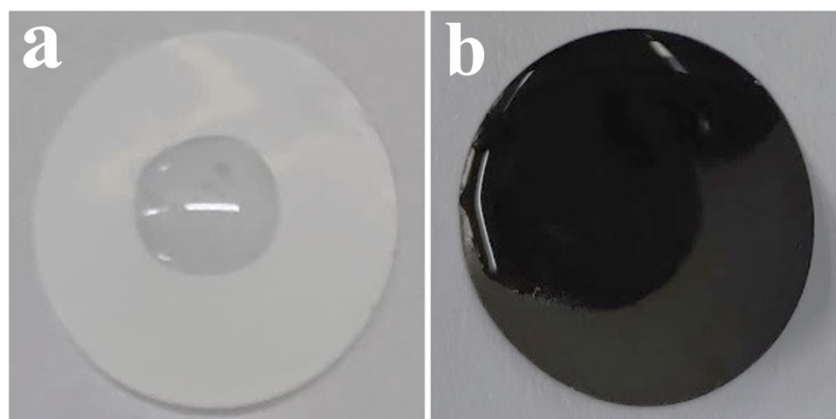

**Fig. S7.** Electrolyte wettability test of the  $\text{Bi}_2\text{Se}_3$ /PP separator.

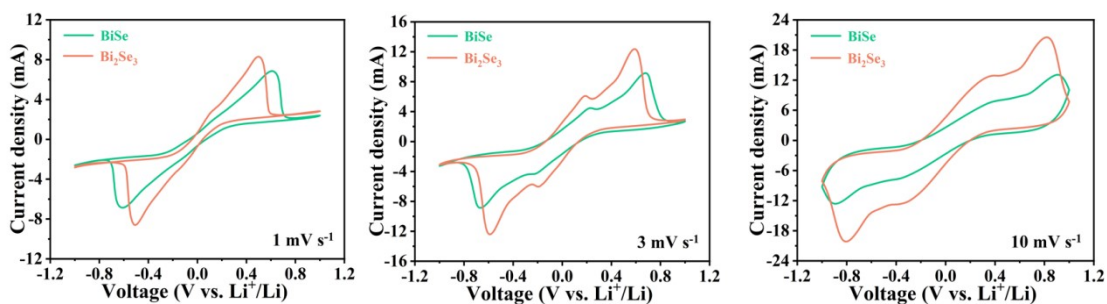

**Fig. S8.** CV curves of the  $\text{Li}_2\text{S}_6$  symmetric cells with  $\text{Bi}_2\text{Se}_3$  and  $\text{BiSe}$  under various scan rates.

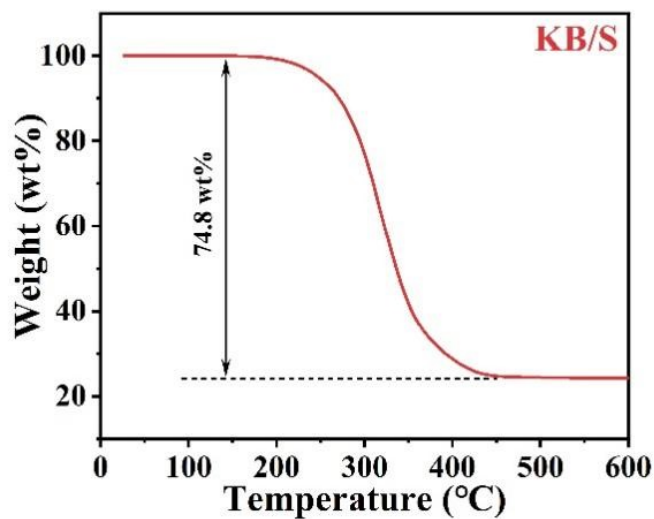

**Fig. S9.** TGA curve of the KB/S.

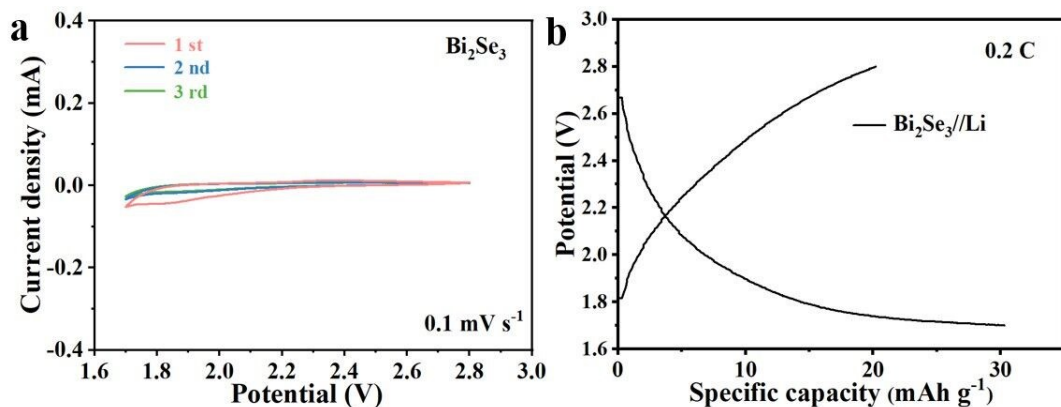

**Fig. S10.** (a) CV curves at  $0.1 \text{ mV s}^{-1}$  and (b) GCD curves at  $0.2 \text{ C}$  of the  $\text{Bi}_2\text{Se}_3//\text{Li}$  cell (without sulfur loading).

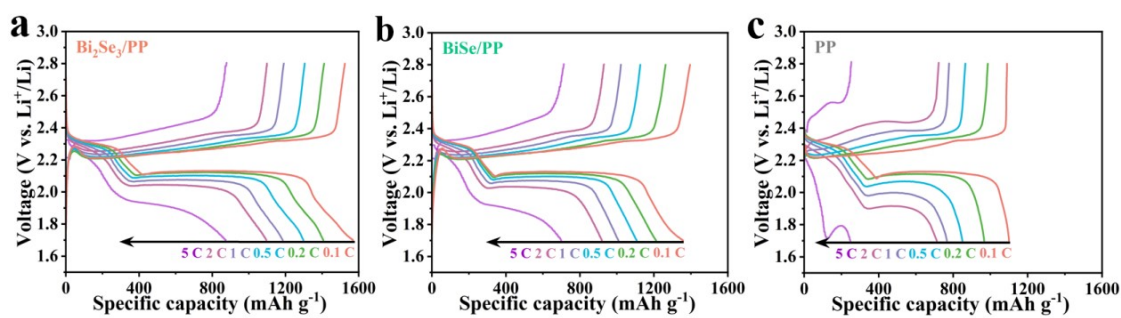

**Fig. S11.** GCD curves of batteries with (a)  $\text{Bi}_2\text{Se}_3/\text{PP}$ , (b)  $\text{BiSe}/\text{PP}$  and (c)  $\text{PP}$  separators.

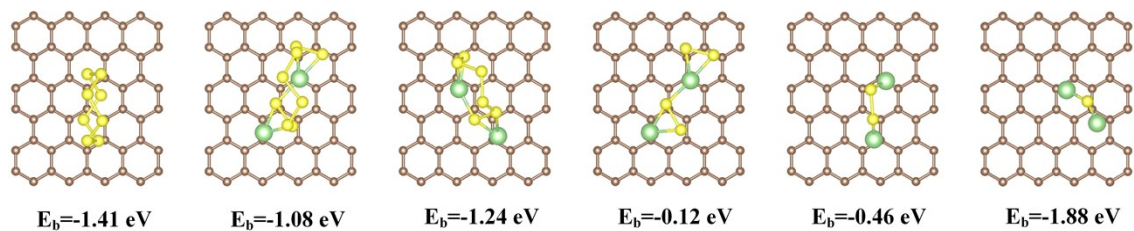

**Fig. S12.** Optimized geometries of  $S_8/Li_2S_x$  ( $x=1, 2, 4, 6, 8$ ) molecules adsorbed on graphene.

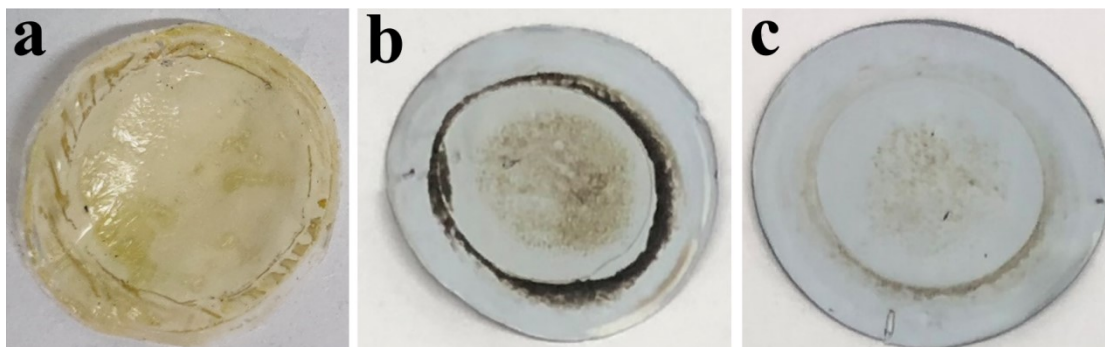

**Fig. S13.** Digital photos of (a) PP, (b) BiSe/PP, (c)  $Bi_2Se_3/PP$  after 100 cycles at 0.2 C.

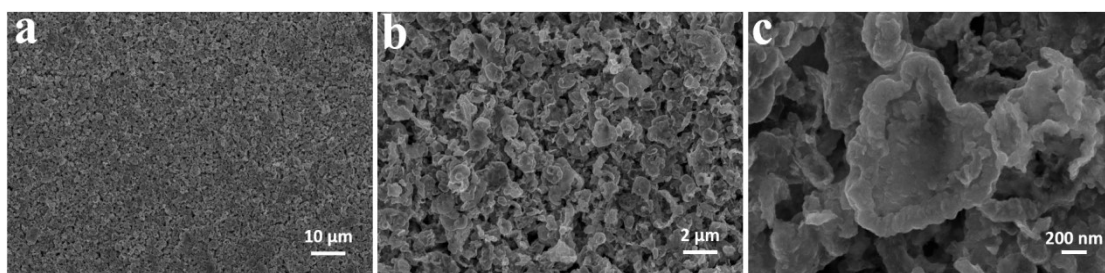

**Fig. S14.** SEM images of  $Bi_2Se_3/PP$  after 100 cycles at 0.2 C

**Table S2.** Comparison of the capacity retention at various high current density in this work with recently reported Li-S batteries.

| Modified materials                  | Sulfur host | S loading (mg cm <sup>-2</sup> ) | Capacity decay rate/cycle number/ C rate | High rate (Initial capacity) (mAh g <sup>-1</sup> cm <sup>-2</sup> ) | Ref.             |
|-------------------------------------|-------------|----------------------------------|------------------------------------------|----------------------------------------------------------------------|------------------|
| MoO <sub>2</sub> -Mo <sub>2</sub> N | CB/S        | 0.8-1.0                          | 0.088%/300/0.5C                          | 842/2C                                                               | [25]             |
| TiO <sub>2</sub> /C/BiOBr           | S           | -                                | 0.194%/300/0.5C                          | 416/2C                                                               | [50]             |
| Ni/SiO <sub>2</sub> /G              | Super P/S   | 1.0-1.2                          | 0.086%/300/1C                            | 782/2C                                                               | [S7]             |
| Co <sub>3</sub> Fe <sub>7</sub>     | -           | 1.0                              | 0.088%/500/1C                            | 1029/2C                                                              | [S8]             |
| TiN                                 | Super P/S   | 1.3                              | 0.091%/400/1C                            | 672/3C                                                               | [S9]             |
| LMO/SP/NF                           | CNTs/S      | 1.6                              | 0.090%/500/1C                            | 575.7/3C                                                             | [S10]            |
| NbN/G                               | Super P/S   | 1.0-1.5                          | 0.096%/300/1C                            | 937/2C                                                               | [S11]            |
| Li-MOF/RGO                          | KB/S        | 1.2-1.4                          | 0.089%/600/1C                            | 742/2C                                                               | [S12]            |
| Co@N-CNTs/N-Mo <sub>x</sub> C       | KB/S        | 1.0                              | 0.090%/500/1C                            | 496/5C                                                               | [S13]            |
| NiSe <sub>2</sub>                   | CNTs/S      | 1.2                              | 0.089%/500/1C                            | 550.9/4C                                                             | [S14]            |
| Pt-NbC-CNT                          | Super C/S   | 1.3-1.5                          | 0.088%/500/0.5C                          | 795/5C                                                               | [S15]            |
| NWCNT-OH@NH <sub>2</sub> -β-CD      | KB/S        | 1.0-1.2                          | 0.087%/800/0.5C                          | 934.5/2C                                                             | [S16]            |
| CoNi@MPC                            | AB/S        | 1.0-1.5                          | 0.090%/500/1C                            | 665.3/4C                                                             | [S17]            |
| <b>Bi<sub>2</sub>Se<sub>3</sub></b> | <b>KB/S</b> | 1.0                              | <b>0.086%/500/1C</b>                     | <b>866.3/5C</b>                                                      | <b>This work</b> |

## References:

- [S1] G. Kresse and J. Furthmüller, *Phys. Rev. B*, 1996, **54**, 11169–11186.
- [S2] G. Kresse and D. Joubert, *Phys. Rev. B*, 1999, **59**, 1758–1775.
- [S3] J. P. Perdew, K. Burke and M. Ernzerhof, *Phys. Rev. Lett.*, 1996, **77**, 3865–3868.
- [S4] S. Grimme, J. Antony, S. Ehrlich and H. Krieg, *J. Chem. Phys.*, 2010, **132**, 154104.
- [S5] J. Shen, X. Xu, J. Liu, Z. Liu, F. Li, R. Hu, J. Liu, X. Hou, Y. Feng, Y. Yu and M. Zhu, *ACS Nano*, 2019, **13**, 8986–8996.
- [S6] G. Wang, L. Peng, K. Li, L. Zhu, J. Zhou, N. Miao and Z. Sun, *Comput. Mater. Sci.*, 2021, **186**, 110064.
- [S7] C. Chen, Q. Jiang, H. Xu, Y. Zhang, B. Zhang, Z. Zhang, Z. Lin and S. Zhang, *Nano Energy*, 2020, **76**, 105033.
- [S8] Z. Gu, C. Cheng, T. Yan, G. Liu, J. Jiang, J. Mao, K. Dai, J. Li, J. Wu and L. Zhang, *Nano Energy*, 2021, **86**, 106111.
- [S9] B. Qi, X. Zhao, S. Wang, K. Chen, Y. Wei, G. Chen, Y. Gao, D. Zhang, Z. Sun and F. Li, *J. Mater. Chem. A*, 2018, **6**, 14359–14366.
- [S10] T. Li, Y. Li, J. Yang, Y. Deng, M. Wu, Q. Wang, R. Liu, B. Ge, X. Xie and J. Ma, *Small*, 2021, **17**, 2104613.
- [S11] H. Shi, Z. Sun, W. Lv, S. Xiao, H. Yang, Y. Shi, K. Chen, S. Wang, B. Zhang, Q.-H. Yang and F. Li, *J. Energy Chem.*, 2020, **45**, 135–141.
- [S12] M. Zhou, Y. Li, T. Lei, W. Chen, G. Rao, L. Xue, A. Hu, Y. Fan, J. Huang, Y. Hu, X. Wang and J. Xiong, *Small*, 2021, **17**, 2104367.
- [S13] G. Zhao, S. Liu, X. Zhang, Y. Zhang, H. Shi, Y. Liu, L. Hou and C. Yuan, *J. Mater. Chem. A*, 2023, **11**, 1856–1865.
- [S14] A.-H. Shao, X.-X. Zhang, Q.-S. Zhang, X. Li, Y. Wu, Z. Zhang, J. Yu and Z.-Y. Yang, *ACS Appl. Energy Mater.*, 2021, **4**, 3431–3438.
- [S15] Y. Liu, D. Hong, M. Chen, Z. Su, Y. Gao, Y. Zhang and D. Long, *ACS Appl. Mater. Interfaces*, 2021, **13**, 35008–35018.
- [S16] T. Feng, T. Zhao, S. Zhu, Z. Wang, L. Wei, N. Zhang, T. Song, L. Li, F. Wu and R. Chen, *ACS Appl. Mater. Interfaces*, 2021, **13**, 23811–23821.
- [S17] R. Luo, Z. Zhang, J. Zhang, B. Xi, F. Tian, W. Chen, J. Feng and S. Xiong, *Small*, 2021, **17**, 2100414.
